# Supplementary material for: The impact of HIV-associated lipodystrophy on healthcare utilization and costs
Source: Springer Nature journal article supplement (doi:10.1186/1742-6405-5-14), 2008-01-01
Supplement: Additional file 1 [file 1742-6405-5-14-s1.pdf]

**TABLE 1. Population Demographics**

|                                                  | Entire Cohort<br>(n=181)                                          | HIV + with<br>Lipodystrophy<br>(n=92) | HIV+ without<br>Lipodystrophy<br>(n=89) | p-value between<br>Lipodystrophy<br>groups |
|--------------------------------------------------|-------------------------------------------------------------------|---------------------------------------|-----------------------------------------|--------------------------------------------|
| Age (years)*                                     | 43 (38, 50)                                                       | 44 (38, 50)                           | 41 (36, 46)                             | 0.03 <sup>¥</sup>                          |
| Race                                             | 32% Hispanic,<br>9% black,<br>52% white,<br>2% Asian,<br>5% other | 34%<br>9%<br>52%<br>2%<br>3%          | 29%<br>10%<br>52%<br>2%<br>7%           | 0.83 <sup>Φ</sup>                          |
| Sex (Male: Female)                               | 128: 53                                                           | 60: 32                                | 68: 21                                  | 0.10 <sup>Φ</sup>                          |
| CD4 count<br>(cells/ $\mu$ L)*                   | 463 (262, 650)                                                    | 496 (317, 678)                        | 421 (242, 641)                          | 0.06 <sup>¥</sup>                          |
| Log <sub>10</sub> HIV viral load<br>(copies/mL)* | 2.6 (2.6, 3.4)                                                    | 2.6 (2.6, 2.6)                        | 2.6 (2.6, 3.8)                          | 0.04 <sup>¥</sup>                          |
| Lipodystrophy<br>Assessment Score*               | 1.5 (0, 3.0)                                                      | 3.0 (2.0, 4.5)                        | 0.5 (0, 1.0)                            | <0.0001 <sup>¥</sup>                       |
| SIBID-S score*                                   |                                                                   | 2.1 (1.4, 2.9)                        | 1.3 (0.6, 2.0)                          | <0.0001 <sup>¥</sup>                       |
| BIQLI score*                                     |                                                                   | -0.5 (-1.2, 0.4)                      | 0.4 (-0.4, 1.5)                         | <0.0001 <sup>¥</sup>                       |
| Hypertension (N (%))                             | 77 (43%)                                                          | 43 (47%)                              | 34 (38%)                                | 0.25 <sup>Φ</sup>                          |
| Diabetes (N (%))                                 | 36 (20%)                                                          | 20 (22%)                              | 16 (18%)                                | 0.53 <sup>Φ</sup>                          |
| Dyslipidemia (N (%))                             | 102 (56%)                                                         | 59 (64%)                              | 43 (48%)                                | 0.03 <sup>Φ</sup>                          |
| HCV (N (%))                                      | 22 (12%)                                                          | 13 (14%)                              | 9 (10%)                                 | 0.41 <sup>Φ</sup>                          |
| AIDS (N (%))                                     | 102 (56%)                                                         | 59 (64%)                              | 43 (48%)                                | 0.03 <sup>Φ</sup>                          |

\*Expressed as median (interquartile range).

<sup>¥</sup>p-value by Wilcoxon rank sum test. <sup>Φ</sup>p-value by chi-square statistics.
