# Supplementary material for: The impact of HIV-associated lipodystrophy on healthcare utilization and costs
Source: Springer Nature journal article supplement (doi:10.1186/1742-6405-5-14), 2008-01-01
Supplement: Additional file 2 [file 1742-6405-5-14-s2.pdf]

Table 2. Healthcare utilization outcomes according to lipodystrophy status.

| <b>Healthcare utilization variable</b>               | <b>HIV + with Lipodystrophy<br/>(N=92)</b> | <b>HIV+ without Lipodystrophy<br/>(N=89)</b> | <b>p-value</b>          |
|------------------------------------------------------|--------------------------------------------|----------------------------------------------|-------------------------|
| <b>Total Healthcare Encounters</b>                   | <b>19 (10, 26)</b>                         | <b>11 (7, 20)</b>                            | <b>0.0002</b>           |
| <b>Total Healthcare Costs</b>                        | <b>\$4,731 (\$2,427, \$8,242)</b>          | <b>\$3,013 (\$1,493, \$5,047)</b>            | <b>0.007</b>            |
| <b>Clinic Visits</b>                                 | <b>18 (9, 26)</b>                          | <b>10 (6, 19)</b>                            | <b>0.0003</b>           |
| <b>Clinic Costs</b>                                  | \$2,841 (\$1,274, \$4,478)                 | \$2,193 (\$939, \$3,653)                     | 0.06                    |
| <b>Emergency Room Visits</b>                         | 0 (0, 1)                                   | 0 (0, 0)                                     | 0.20                    |
| <b>Emergency Room Costs</b>                          | \$0 (\$0, \$469)                           | \$0 (\$0, \$0)                               | 0.20                    |
| <b>Hospital Admission during 12 month period (%)</b> | <b>21%</b>                                 | <b>9%</b>                                    | <b>0.03<sup>¥</sup></b> |
| <b>Length of Stay (days)*</b>                        | 3 (2, 8)                                   | 3 (1, 5)                                     | 0.21                    |
| <b>Hospital Admission Costs*</b>                     | \$4,668 (\$0, \$8,163)                     | \$4,775 (\$1,608, \$9,508)                   | 0.67                    |

Data reported as median (IQR) unless otherwise specified. p-value by Wilcoxon rank sum test unless otherwise specified.

<sup>¥</sup>p-value by chi-square analysis. \*Data from hospitalized patients only.
